# Supplementary material
Source: PubMed Central journal article supplement (PMC4213119)
Supplement: supp_pp.114.243766_243766supp.pdf [file supp_pp.114.243766_243766supp.pdf]

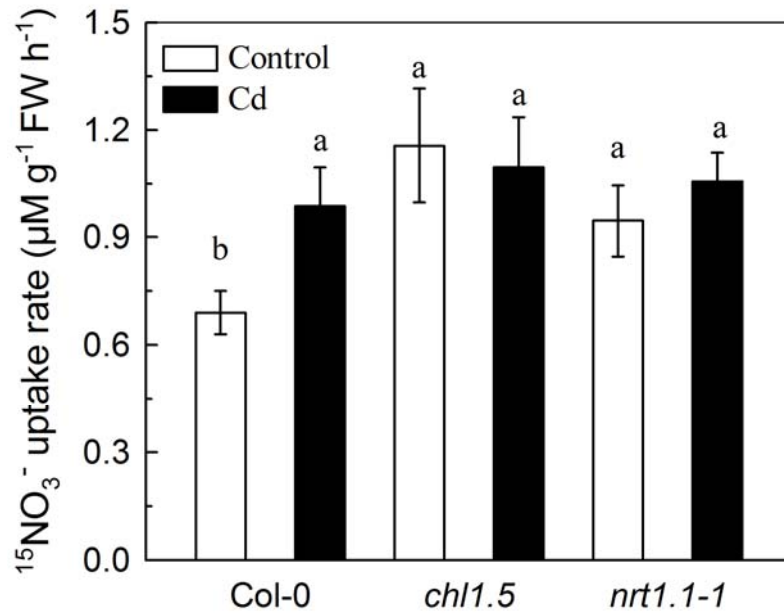

**Supplemental Fig. S1.** Effect of 10  $\mu\text{M}$  Cd on high-affinity  $\text{NO}_3^-$  uptake by Col-0, *chl1.5*, or *nrt1.1-1* plants. The treatments were the same as those in Fig. 1. High-affinity  $\text{NO}_3^-$  uptake was measured using 200  $\mu\text{M}$   $^{15}\text{NO}_3^-$  for 5 min. Bars represent the SD ( $n = 6$  biological replicates). Different lowercase letters above bars indicate significant differences at  $P < 0.05$  (least significant difference test).

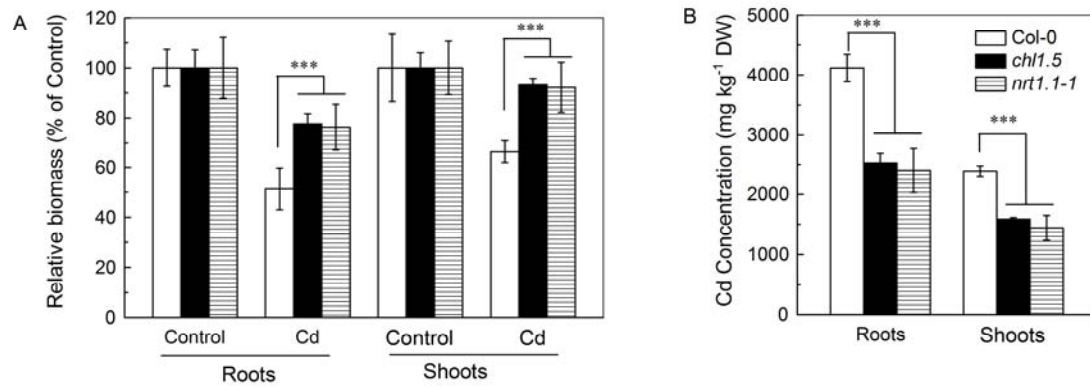

**Supplemental Fig. S2.** Effect of 20  $\mu\text{M}$  Cd on growth of, and Cd levels in, Col-0, *chl1.5*, and *nrt1.1-1* plants. The plants were pre-cultured as described in Fig. 1 for 5 weeks, then were transferred to complete nutrient solution containing either 0 (Control) or 20  $\mu\text{M}$  CdCl<sub>2</sub> (Cd) for 7 days, after which the analyses were performed. A, Relative biomass. B, Cd concentration. Bars represent the SD ( $n = 5-8$  biological replicates). Asterisks indicate significant differences compared to the Col-0 plant ( $***P < 0.001$ ; two-tailed Student's  $t$  test).

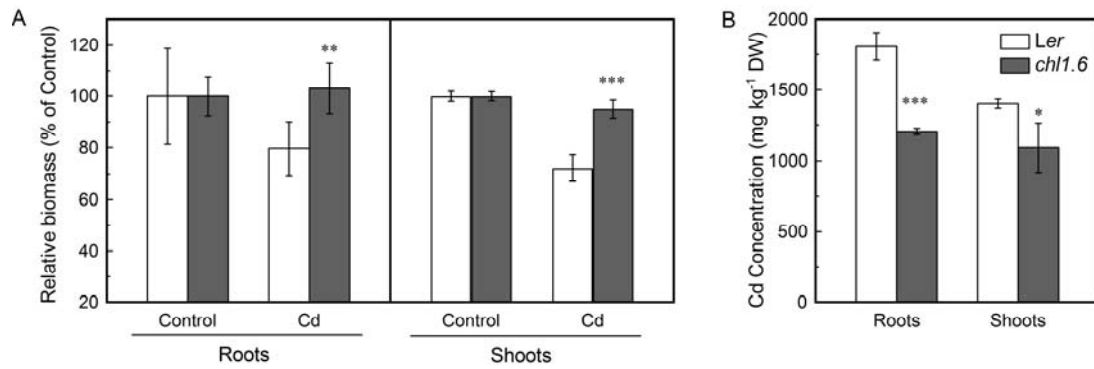

**Supplemental Fig. S3.** Effect of 10  $\mu\text{M}$  Cd on growth of, and Cd levels in, *Ler* and *chl1.6* plants. Treatments were the same as those in Fig. 1. A, Relative biomass calculated as the mean dry weight relative to the control treatment for the same plant line. B, Cd concentrations in Cd-treated plants. Bars represent the SD ( $n = 5\text{--}8$  biological replicates). Asterisks indicate significant differences compared to *Ler* plants (\* $P < 0.05$ , \*\* $P < 0.01$ , \*\*\* $P < 0.001$ ; two-tailed Student's  $t$  test).

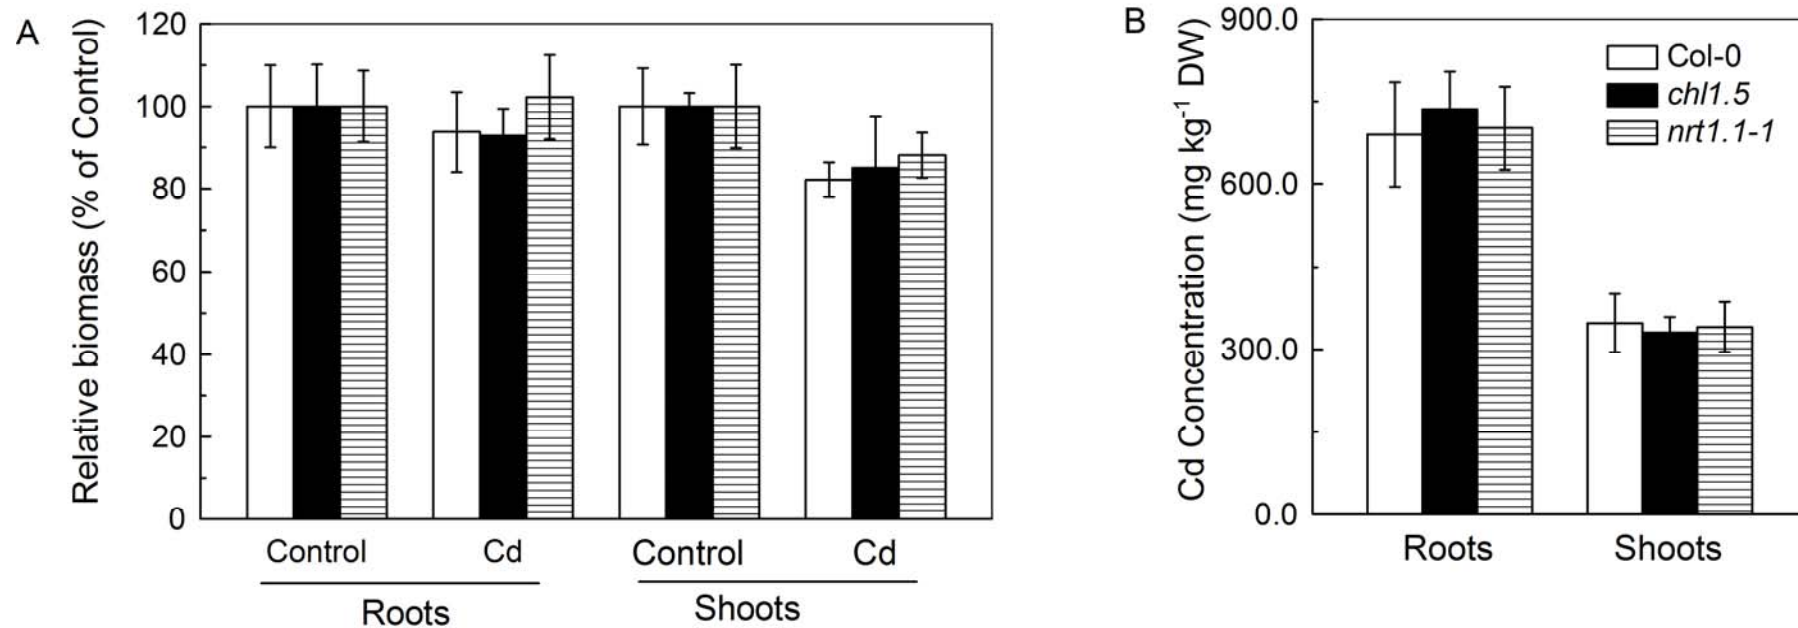

**Supplemental Fig. S4.** Effect of  $\text{NO}_3^-$  removal on growth of, and Cd uptake by, Col-0, *chl1.5*, and *nrt1.1-1* plants. The plants were pre-cultured as described in Fig. 1 for 5 weeks, then were grown in  $\text{NO}_3^-$ -free nutrient solution containing either 0 (Control) or 10  $\mu\text{M}$   $\text{CdCl}_2$  (Cd) for 7 days. A, Relative biomass calculated as the mean dry weight relative to the control treatment for the same plant line. B, Cd concentrations. Bars represent the SD ( $n = 5-8$  biological replicates).

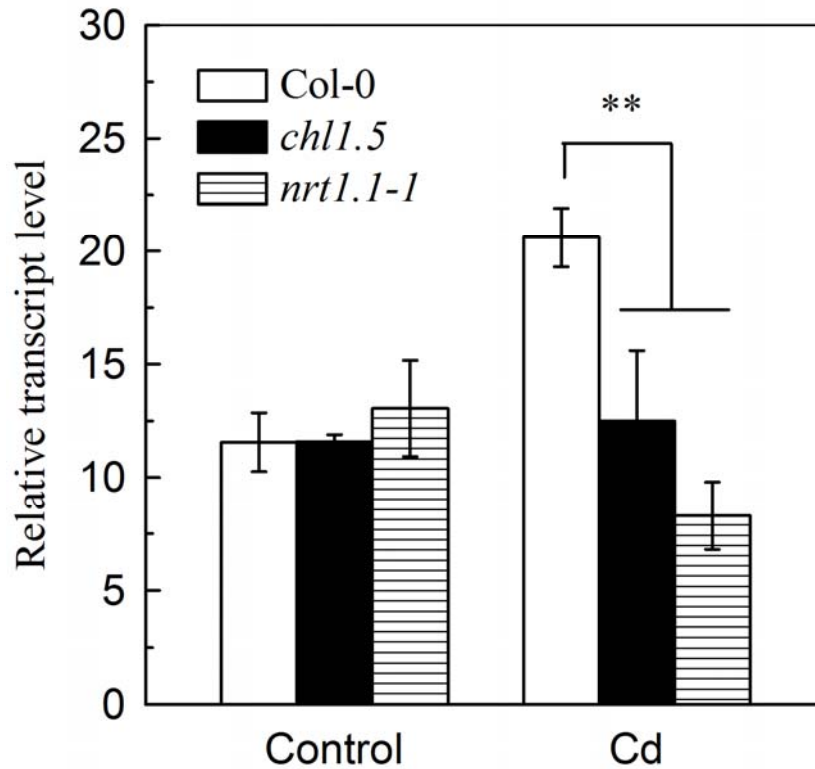

**Supplemental Fig. S5.** Effect of 10  $\mu\text{M}$  Cd on *IRT1* expression in Col-0, *chl1.5*, and *nrt1.1-1* plants in growth medium containing 10 mM  $\text{NO}_3^-$ . The plants were pre-cultured as described in Fig. 1 for 5 weeks, then were grown in either Cd-free (Control) or 10  $\mu\text{M}$  Cd-containing (Cd) nutrient solution containing 10 mM  $\text{KNO}_3$  for 7 days. Transcript levels were normalized to *UBQ10* mRNA levels (100%). Bars represent the SD ( $n = 5$  biological replicates). Asterisks indicate significant differences compared to Col-0 plants (\*\* $P < 0.01$ ; two-tailed Student's *t* test).

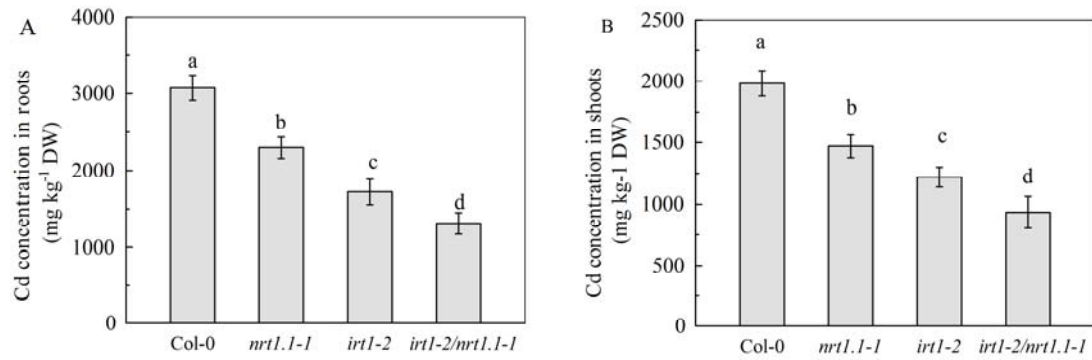

**Supplemental Fig. S6.** Cd levels in Col-0, *nrt1.1-1*, *irt1-2*, and *irt1-2/nrt1.1-1* plants after 7 days of exposure to Cd in 10 mM NO<sub>3</sub><sup>-</sup> medium. The plants were pre-cultured as described in Fig. 1 for 5 weeks, then were grown in nutrient solution containing 10 μM Cd and 10 mM KNO<sub>3</sub> for 7 days. A, Cd concentrations in roots. B, Cd concentrations in shoots. Bars represent the SD (*n* = 5 biological replicates). Different lowercase letters above bars indicate significant differences at *P* < 0.05 (least significant difference test).

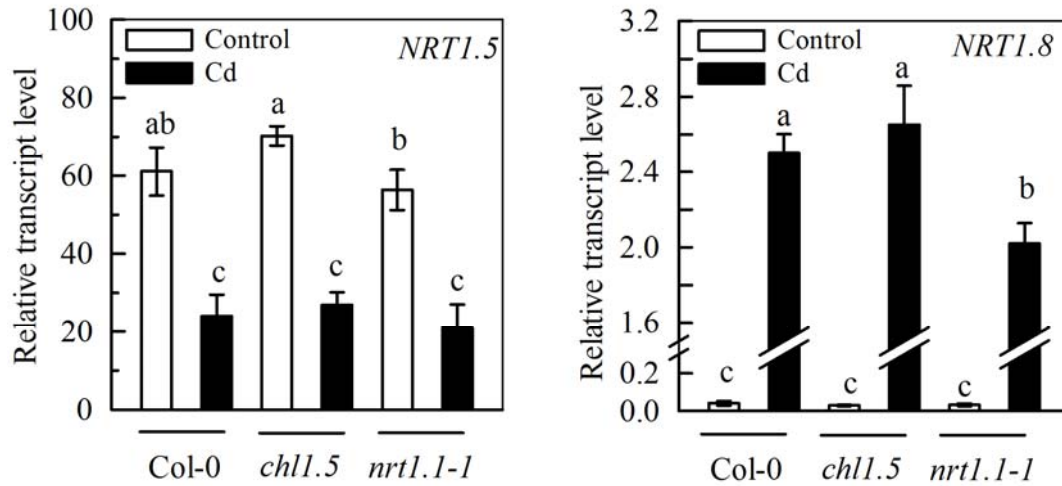

**Supplemental Fig. S7.** Effect of 10  $\mu$ M Cd on expression of *NRT1.5* and *NRT1.8* in Col-0, *chl1.5*, and *nrt1.1-1* plants. Treatments were the same as those in Fig. 1. Gene expression was analyzed by real-time qPCR and transcript levels normalized to *UBQ10* mRNA levels (100%). Bars represent the SD ( $n = 5$  biological replicates). Different lowercase letters above bars indicate significant differences at  $P < 0.05$  (least significant difference test).

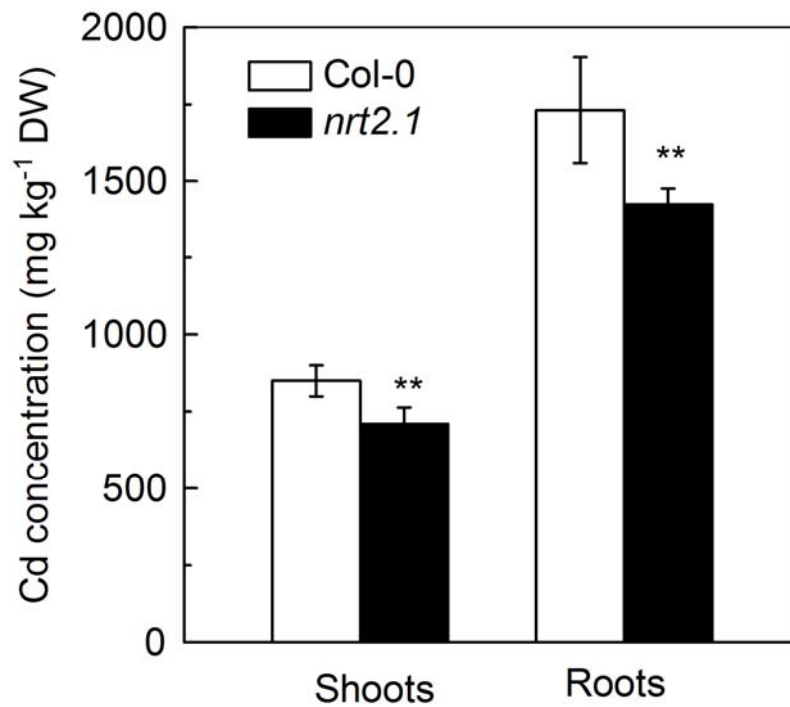

**Supplemental Fig. S8.** Cd levels in Col-0 plants and *nrt2.1* mutants grown for 7 days in 200  $\mu\text{M}$   $\text{NO}_3^-$  medium. The plants were pre-cultured as described in Fig. 1 for 5 weeks, then grown in nutrient solution containing 10  $\mu\text{M}$  Cd and 0.2 mM  $\text{KNO}_3$  for 7 days. Bars represent the SD ( $n = 5$  biological replicates). Asterisks indicate significant differences compared to Col-0 plants (\*\* $P < 0.01$ ; two-tailed Student's  $t$  test).



**Supplemental Table S1.** Effect of Cd treatment on the expression in roots of genes related to uptake of metal cations. Gene expression was measured by Illumina mRNA-Seq analysis. A statistical cutoff of  $p < 0.1$  after Bonferroni correction (see gray scale) was used to determine which genes were differentially expressed. A positive ratio indicates that gene expression was induced and a negative ratio that gene expression was repressed.

| Gene_id   | Annotation                                     | Control |               |                                |          | Cd     |               |                                |          |
|-----------|------------------------------------------------|---------|---------------|--------------------------------|----------|--------|---------------|--------------------------------|----------|
|           |                                                | FPKM    |               | Ratio                          | P value  | FPKM   |               | Ratio                          | P value  |
|           |                                                | Col-0   | <i>chl1.5</i> | [log2 ( <i>chl1.5</i> /Col-0)] |          | Col-0  | <i>chl1.5</i> | [log2 ( <i>chl1.5</i> /Col-0)] |          |
| AT1G05300 | Zinc transporter 5 precursor                   | 12.40   | 24.48         | 0.98                           | 4.66E-02 | 23.97  | 26.46         | 0.14                           | 7.50E-01 |
| AT1G10970 | Zinc transporter 4 precursor                   | 6.13    | 4.96          | -0.31                          | 6.25E-01 | 17.99  | 15.17         | -0.25                          | 5.97E-01 |
| AT1G55910 | Zinc transporter 11 precursor                  | 6.90    | 8.35          | 0.28                           | 6.57E-01 | 17.39  | 21.33         | 0.29                           | 5.41E-01 |
| AT1G60960 | Iron regulated transporter 3                   | 25.64   | 36.20         | 0.50                           | 2.42E-01 | 57.78  | 69.28         | 0.26                           | 5.34E-01 |
| AT2G29410 | Metal tolerance protein B1                     | 1.47    | 1.04          | -0.50                          | 7.93E-01 | 1.14   | 1.72          | 0.59                           | 7.41E-01 |
| AT2G30080 | ZIP metal ion transporter family               | 16.58   | 12.17         | -0.45                          | 4.19E-01 | 16.53  | 16.61         | 0.01                           | 9.90E-01 |
| AT2G32270 | Zinc transporter 3 precursor                   | 76.78   | 94.18         | 0.29                           | 4.87E-01 | 112.75 | 129.72        | 0.20                           | 6.44E-01 |
| AT2G46800 | Zinc transporter of Arabidopsis thaliana       | 71.33   | 71.28         | 0.00                           | 9.98E-01 | 60.62  | 51.61         | -0.23                          | 6.53E-01 |
| AT3G12750 | Zinc transporter 1 precursor                   | 11.50   | 6.66          | -0.79                          | 5.65E-01 | 35.59  | 29.98         | -0.25                          | 7.79E-01 |
| AT3G58810 | Metal tolerance protein A2                     | 25.41   | 18.92         | -0.43                          | 3.35E-01 | 42.87  | 53.55         | 0.32                           | 4.63E-01 |
| AT5G59520 | ZRT/IRT-like protein 2                         | 18.51   | 11.83         | -0.65                          | 2.02E-01 | 69.82  | 66.76         | -0.06                          | 8.77E-01 |
| AT4G19690 | Iron-regulated transporter 1                   | 146.59  | 79.77         | -0.88                          | 6.77E-02 | 229.67 | 180.38        | -0.35                          | 5.09E-01 |
| AT4G19680 | Iron regulated transporter 2                   | 0.87    | 1.22          | 0.49                           | 7.23E-01 | 4.65   | 4.96          | 0.09                           | 9.08E-01 |
| AT1G15960 | NRAMP metal ion transporter 6                  | 18.94   | 16.99         | -0.16                          | 8.58E-01 | 32.09  | 33.38         | 0.06                           | 9.49E-01 |
| AT1G47240 | NRAMP metal ion transporter 2                  | 14.15   | 16.55         | 0.23                           | 6.64E-01 | 14.98  | 14.23         | -0.07                          | 8.86E-01 |
| AT1G80830 | NRAMP metal ion transporter 1                  | 316.07  | 255.78        | -0.31                          | 5.77E-01 | 283.74 | 227.85        | -0.32                          | 5.53E-01 |
| AT2G23150 | NRAMP metal ion transporter 3                  | 14.77   | 22.90         | 0.63                           | 1.55E-01 | 14.55  | 13.07         | -0.15                          | 7.41E-01 |
| AT5G03280 | NRAMP metal ion transporter family protein     | 30.26   | 28.57         | -0.08                          | 8.49E-01 | 20.78  | 20.75         | 0.00                           | 9.97E-01 |
| AT5G67330 | NRAMP metal ion transporter 4                  | 21.34   | 20.07         | -0.09                          | 8.35E-01 | 45.53  | 43.33         | -0.07                          | 8.64E-01 |
| AT1G16010 | Magnesium transporter 2                        | 28.49   | 28.66         | 0.01                           | 9.86E-01 | 28.94  | 30.93         | 0.10                           | 8.56E-01 |
| AT1G29820 | Magnesium transporter CorA-like family protein | 18.14   | 18.65         | 0.04                           | 9.27E-01 | 16.13  | 15.57         | -0.05                          | 9.09E-01 |
| AT1G29830 | Magnesium transporter CorA-like family protein | 3.48    | 2.53          | -0.46                          | 4.88E-01 | 3.94   | 2.90          | -0.44                          | 5.88E-01 |
| AT1G61790 | Magnesium transporter family protein           | 135.13  | 129.51        | -0.06                          | 8.86E-01 | 151.67 | 148.29        | -0.03                          | 9.40E-01 |
| AT1G80900 | Magnesium transporter 1                        | 5.99    | 10.15         | 0.76                           | 2.45E-01 | 8.01   | 8.81          | 0.14                           | 8.37E-01 |
| AT2G03620 | Magnesium transporter 3                        | 11.45   | 13.34         | 0.22                           | 6.56E-01 | 12.81  | 14.96         | 0.22                           | 6.41E-01 |
| AT2G04305 | Magnesium transporter CorA-like family protein | 23.42   | 24.36         | 0.06                           | 8.93E-01 | 20.90  | 23.15         | 0.15                           | 7.30E-01 |
| AT2G19340 | Magnesium transporter family protein           | 19.93   | 15.03         | -0.41                          | 5.10E-01 | 17.64  | 18.53         | 0.07                           | 9.09E-01 |
| AT2G42950 | Magnesium transporter CorA-like family protein | 5.03    | 7.03          | 0.48                           | 4.07E-01 | 7.22   | 7.41          | 0.04                           | 9.46E-01 |
| AT3G19640 | Magnesium transporter 4                        | 38.95   | 35.11         | -0.15                          | 7.20E-01 | 40.13  | 39.21         | -0.03                          | 9.36E-01 |
| AT3G58970 | Magnesium transporter 6                        | 21.81   | 22.17         | 0.02                           | 9.55E-01 | 20.65  | 21.22         | 0.04                           | 9.28E-01 |

|           |                                                                         |       |       |       |          |       |       |       |          |
|-----------|-------------------------------------------------------------------------|-------|-------|-------|----------|-------|-------|-------|----------|
| AT4G29870 | Magnesium transporter family protein                                    | 84.56 | 82.14 | -0.04 | 9.21E-01 | 78.70 | 80.59 | 0.03  | 9.36E-01 |
| AT5G09690 | Magnesium transporter 7                                                 | 17.64 | 16.68 | -0.08 | 8.86E-01 | 16.38 | 17.14 | 0.07  | 9.07E-01 |
| AT5G09710 | Magnesium transporter CorA-like family protein                          | 1.89  | 1.45  | -0.38 | 7.02E-01 | 3.07  | 2.39  | -0.36 | 6.82E-01 |
| AT5G09720 | Magnesium transporter CorA-like family protein                          | 5.16  | 3.30  | -0.64 | 3.89E-01 | 11.27 | 9.35  | -0.27 | 6.44E-01 |
| AT5G22830 | Magnesium transporter 10                                                | 8.28  | 7.31  | -0.18 | 8.00E-01 | 4.44  | 4.67  | 0.07  | 9.34E-01 |
| AT5G64560 | Magnesium transporter 9                                                 | 6.11  | 7.60  | 0.31  | 5.91E-01 | 8.91  | 11.37 | 0.35  | 5.02E-01 |
| AT2G17780 | PLAC8 family protein                                                    | 0.11  | 0.37  | 1.68  | 2.83E-01 | 1.35  | 0.54  | -1.31 | 2.02E-01 |
| AT4G35920 | PLAC8 family protein                                                    | 50.28 | 47.48 | -0.08 | 8.64E-01 | 30.43 | 33.50 | 0.14  | 7.69E-01 |
| AT2G22950 | Cation transporter/ E1-E2 ATPase family protein                         | 0.94  | 1.29  | 0.46  | 5.65E-01 | 0.60  | 0.49  | -0.31 | 7.48E-01 |
| AT4G37640 | Calcium ATPase 2                                                        | 31.28 | 37.40 | 0.26  | 5.47E-01 | 36.51 | 35.80 | -0.03 | 9.48E-01 |
| AT5G01490 | Cation exchanger 4                                                      | 19.72 | 25.88 | 0.39  | 3.76E-01 | 20.51 | 24.58 | 0.26  | 5.55E-01 |
| AT5G17860 | Calcium exchanger 7                                                     | 0.19  | 1.86  | 3.29  | 3.91E-03 | 0.05  | 0.15  | 1.53  | 4.00E-01 |
| AT1G08960 | Cation exchanger 11                                                     | 4.85  | 4.49  | -0.11 | 8.53E-01 | 6.44  | 6.31  | -0.03 | 9.58E-01 |
| AT1G54115 | Cation calcium exchanger 4                                              | 19.86 | 18.25 | -0.12 | 7.76E-01 | 21.21 | 21.33 | 0.01  | 9.84E-01 |
| AT1G55730 | Cation exchanger 5                                                      | 25.81 | 29.48 | 0.19  | 6.56E-01 | 27.93 | 28.86 | 0.05  | 9.10E-01 |
| AT2G38170 | Cation exchanger 1                                                      | 15.35 | 26.89 | 0.81  | 7.61E-02 | 25.93 | 27.00 | 0.06  | 8.96E-01 |
| AT3G13320 | Cation exchanger 2                                                      | 30.03 | 35.87 | 0.26  | 5.39E-01 | 36.57 | 32.68 | -0.16 | 6.98E-01 |
| AT3G14070 | Cation exchanger 9                                                      | 4.60  | 7.26  | 0.66  | 2.55E-01 | 5.12  | 6.70  | 0.39  | 4.99E-01 |
| AT3G51860 | Cation exchanger 3                                                      | 4.59  | 2.78  | -0.73 | 2.81E-01 | 21.95 | 17.47 | -0.33 | 4.50E-01 |
| AT5G01490 | Cation exchanger 4                                                      | 19.72 | 25.88 | 0.39  | 3.76E-01 | 20.51 | 24.58 | 0.26  | 5.55E-01 |
| AT5G17860 | Calcium exchanger 7                                                     | 12.28 | 15.99 | 0.38  | 4.22E-01 | 0.05  | 0.15  | 1.53  | 4.00E-01 |
| AT1G04690 | Potassium channel beta subunit 1                                        | 78.41 | 67.55 | -0.22 | 6.10E-01 | 97.78 | 81.38 | -0.26 | 5.36E-01 |
| AT1G31120 | K <sup>+</sup> uptake permease 10                                       | 18.21 | 22.00 | 0.27  | 5.15E-01 | 13.39 | 13.09 | -0.03 | 9.39E-01 |
| AT1G60160 | Potassium transporter family protein                                    | 4.52  | 2.81  | -0.69 | 2.50E-01 | 1.54  | 0.79  | -0.97 | 2.41E-01 |
| AT1G70300 | K <sup>+</sup> uptake permease 6                                        | 34.91 | 46.40 | 0.41  | 3.37E-01 | 38.63 | 47.47 | 0.30  | 4.89E-01 |
| AT2G26650 | K <sup>+</sup> transporter 1                                            | 84.77 | 56.62 | -0.58 | 2.43E-01 | 63.94 | 53.64 | -0.25 | 5.90E-01 |
| AT2G30070 | Potassium transporter 1                                                 | 6.17  | 4.96  | -0.31 | 5.64E-01 | 4.28  | 4.72  | 0.14  | 8.07E-01 |
| AT2G35060 | K <sup>+</sup> uptake permease 11                                       | 9.55  | 9.92  | 0.05  | 9.05E-01 | 8.83  | 8.32  | -0.09 | 8.56E-01 |
| AT2G40540 | Potassium transporter 2                                                 | 13.99 | 11.52 | -0.28 | 5.66E-01 | 27.87 | 20.31 | -0.46 | 3.04E-01 |
| AT3G02050 | K <sup>+</sup> uptake transporter 3                                     | 5.40  | 4.55  | -0.25 | 6.43E-01 | 4.64  | 4.06  | -0.19 | 7.30E-01 |
| AT3G02850 | STELAR K <sup>+</sup> outward rectifier                                 | 56.70 | 24.75 | -1.20 | 9.62E-03 | 8.80  | 11.76 | 0.42  | 4.70E-01 |
| AT3G09030 | BTB/POZ domain-containing protein                                       | 14.02 | 11.74 | -0.26 | 5.93E-01 | 14.33 | 13.09 | -0.13 | 7.83E-01 |
| AT4G00630 | K <sup>+</sup> efflux antiporter 2                                      | 20.11 | 20.86 | 0.05  | 9.14E-01 | 16.71 | 13.15 | -0.35 | 5.07E-01 |
| AT4G01840 | Ca <sup>2+</sup> -activated outward rectifying K <sup>+</sup> channel 5 | 7.00  | 16.02 | 1.20  | 2.34E-02 | 13.44 | 16.84 | 0.33  | 4.91E-01 |
| AT4G04850 | K <sup>+</sup> efflux antiporter 3                                      | 1.75  | 1.56  | -0.17 | 8.16E-01 | 1.44  | 1.14  | -0.34 | 6.59E-01 |
| AT4G10310 | High-affinity K <sup>+</sup> transporter 1                              | 40.27 | 14.83 | -1.44 | 1.05E-04 | 35.40 | 33.56 | -0.08 | 8.54E-01 |
| AT4G13420 | High affinity K <sup>+</sup> transporter 5                              | 9.88  | 40.92 | 2.05  | 3.38E-06 | 51.09 | 97.20 | 0.93  | 4.10E-02 |
| AT4G18160 | Ca <sup>2+</sup> -activated outward rectifying K <sup>+</sup> channel 6 | 8.89  | 7.57  | -0.23 | 6.82E-01 | 5.57  | 5.68  | 0.03  | 9.62E-01 |
| AT4G19960 | K <sup>+</sup> uptake permease 9                                        | 6.98  | 6.58  | -0.08 | 8.65E-01 | 7.41  | 5.69  | -0.38 | 4.48E-01 |
| AT4G23640 | Potassium transporter family protein                                    | 25.98 | 26.67 | 0.04  | 9.29E-01 | 24.45 | 26.96 | 0.14  | 7.36E-01 |
| AT4G23700 | Cation/H <sup>+</sup> exchanger 17                                      | 4.28  | 6.47  | 0.59  | 2.64E-01 | 5.96  | 7.29  | 0.29  | 5.60E-01 |
| AT4G32650 | Potassium channel in Arabidopsis thaliana 3                             | 52.27 | 51.41 | -0.02 | 9.58E-01 | 55.60 | 49.27 | -0.17 | 6.90E-01 |
| AT4G33530 | K <sup>+</sup> uptake permease 5                                        | 18.18 | 21.76 | 0.26  | 5.35E-01 | 14.66 | 12.34 | -0.25 | 5.60E-01 |
| AT5G09400 | K <sup>+</sup> uptake permease 7                                        | 18.73 | 19.36 | 0.05  | 9.09E-01 | 19.36 | 19.75 | 0.03  | 9.46E-01 |
| AT5G14880 | Potassium transporter family protein                                    | 66.20 | 51.53 | -0.36 | 4.05E-01 | 35.14 | 43.57 | 0.31  | 4.61E-01 |

|           |                                                                         |        |        |       |          |        |        |       |          |
|-----------|-------------------------------------------------------------------------|--------|--------|-------|----------|--------|--------|-------|----------|
| AT5G37500 | Gated outwardly-rectifying K <sup>+</sup> channel                       | 3.84   | 5.99   | 0.64  | 2.34E-01 | 4.60   | 5.23   | 0.19  | 7.29E-01 |
| AT5G46370 | Ca <sup>2+</sup> -activated outward rectifying K <sup>+</sup> channel 2 | 4.48   | 9.29   | 1.05  | 8.91E-02 | 2.11   | 3.28   | 0.63  | 4.21E-01 |
| AT5G55630 | Outward rectifying potassium channel protein                            | 21.19  | 18.48  | -0.20 | 6.80E-01 | 27.24  | 32.56  | 0.26  | 5.47E-01 |
| AT4G33530 | K <sup>+</sup> uptake permease 5                                        | 18.18  | 21.76  | 0.26  | 5.35E-01 | 14.66  | 12.34  | -0.25 | 5.60E-01 |
| AT5G09400 | K <sup>+</sup> uptake permease 7                                        | 18.73  | 19.36  | 0.05  | 9.09E-01 | 19.36  | 19.75  | 0.03  | 9.46E-01 |
| AT5G14880 | Potassium transporter family protein                                    | 66.20  | 51.53  | -0.36 | 4.05E-01 | 35.14  | 43.57  | 0.31  | 4.61E-01 |
| AT2G37925 | Copper transporter 4                                                    | 9.18   | 4.11   | -1.16 | 2.17E-01 | 1.01   | 3.72   | 1.89  | 1.45E-01 |
| AT3G46900 | Copper transporter 2                                                    | 12.66  | 2.16   | -2.55 | 4.77E-03 | 153.14 | 137.69 | -0.15 | 7.13E-01 |
| AT5G20650 | Copper transporter 5                                                    | 231.41 | 210.72 | -0.14 | 7.61E-01 | 241.01 | 276.87 | 0.20  | 6.57E-01 |
| AT5G59030 | Copper transporter 1                                                    | 4.29   | 4.07   | -0.07 | 9.31E-01 | 5.41   | 3.69   | -0.55 | 5.06E-01 |

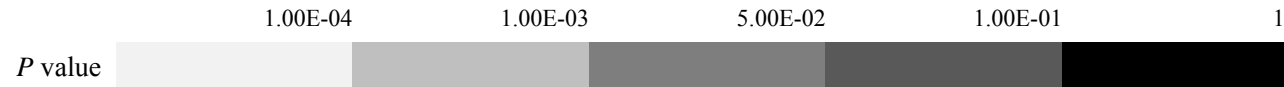

**Supplemental Table S2.** Primers used in this work.

| Gene             | Primer          | Sequence (5'-3')            | Method         |
|------------------|-----------------|-----------------------------|----------------|
| AT4G05320        | <i>UBQ10</i> F  | ACCCTAACGGGAAAGACGA         | Real-time qPCR |
|                  | <i>UBQ10</i> R  | GGAGCCTGAGAACAAGATGAA       |                |
| AT1G12110        | <i>NRT1.1</i> F | TTCTCGTGACAATCGTCG          | Real-time qPCR |
|                  | <i>NRT1.1</i> R | TGGAATACTCGGCTCATCAT        |                |
| AT1G69850        | <i>NRT1.2</i> F | GGATTTCGGTGTTTCTACCAT       | Real-time qPCR |
|                  | <i>NRT1.2</i> R | CGCAATGATTTGAGGGAC          |                |
| AT1G08090        | <i>NRT2.1</i> F | AACAAGGGCTAACGTGGATG        | Real-time qPCR |
|                  | <i>NRT2.1</i> R | CTGCTTCTCCTGCTCATTCC        |                |
| AT1G08100        | <i>NRT2.2</i> F | CAGGTGGAAACAGAGCTGCCATGG    | Real-time qPCR |
|                  | <i>NRT2.2</i> R | GACCATAGATACAACGGCAGTGACGAG |                |
| AT5G50200        | <i>NRT3.1</i> F | GGCCATGAAGTTGCCTATG         | Real-time qPCR |
|                  | <i>NRT3.1</i> R | TCTTGGCCTTCCTCTTCTCA        |                |
| AT5G60770        | <i>NRT2.4</i> F | CCGTCTTCT CCA TGTCTTTC      | Real-time qPCR |
|                  | <i>NRT2.4</i> R | CTGACCATTGAACATTGTG         |                |
| AT1G32450        | <i>NRT1.5</i> F | TGTCATTGGACTTTCATCGC        | Real-time qPCR |
|                  | <i>NRT1.5</i> R | CCCACAACCTCTTGGTCTAATC      |                |
| AT4G21680        | <i>NRT1.8</i> F | GGCTTCAGATTCTTGGATAG        | Real-time qPCR |
|                  | <i>NRT1.8</i> R | AACCACAGAGTAGAGGATGG        |                |
| AT4G19690        | <i>IRT1</i> F   | AAGCTTTGATCACGGTTGG         | Real-time qPCR |
|                  | <i>IRT1</i> R   | TTAGGTCCCATGAACTCCG         |                |
| AT4G19690        | Salk_054554 LP  | CAAGTAAAACCAGCGCTTTTG       | Genotyping     |
|                  | Salk_054554 RP  | GCTCTTTGCTTCCATCAAATG       |                |
| AT1G12110        | Salk_097431 LP  | ATATTGGAATCCCTTTCTCGG       | Genotyping     |
|                  | Salk_097431 RP  | ATATTGGAATCCCTTTCTCGG       |                |
| AT1G08090        | CS859604 LP     | GCAAGCGACTATCATCACTCC       | Genotyping     |
|                  | CS859604 RP     | GTTCTCCATGAGCTTCGTGAG       |                |
| pBIN-pROK2 T-DNA | Lab1.3          | ATTTTGCCGATTTCCGGAAC        | Genotyping     |
